# Supplementary material
Source: publisher site journal article supplement (https://www.degruyter.com/publication/journal_key/JMC/downloadAsset/JMC_Template%20for%20Authors%20Statements.pdf)
Supplement: Supplementary file 1 [file JMC_Template%20for%20Authors%20Statements.pdf]

## Acknowledgments

(If applicable).

## Funding information

None declared.

## Author contributions

All authors have accepted responsibility for the entire content of this manuscript and approved its submission.

## Conflict of interest

Authors state no conflict of interest.

## Informed consent (If applicable).

Informed consent was obtained from all individuals included in this study.

## Ethical approval (If applicable).

The research related to human use has been complied with all the relevant national regulations, institutional policies and in accordance the tenets of the Helsinki Declaration, and has been approved by the authors' institutional review board or equivalent committee.

Or

The research related to animals' use has been complied with all the relevant national regulations and institutional policies for the care and use of animals.

Or

The conducted research is not related to either human or animals use.

## Data availability statement

Data availability statements can take one of the following forms (or a combination of more than one if required for multiple types of research data):

- The datasets generated during and/or analysed during the current study are available in the [NAME] repository, [PERSISTENT WEB LINK TO DATASETS]
- The datasets generated during and/or analysed during the current study are available from the corresponding author on reasonable request.
- Data sharing is not applicable to this article as no datasets were generated or analysed during the current study.
- All data generated or analysed during this study are included in this published article [and its supplementary information files].
- The data that support the findings of this study are available from [third party name] but restrictions apply to the availability of these data, which were used under license for the current study, and so are not publicly available. Data are however available from the authors upon reasonable request and with permission of [third party name].
